# Supplementary material
Source: publisher site journal article supplement (https://www.degruyterbrill.com/publication/isbn/9783110376265/downloadAsset/9783110376265_Inhaltsverzeichnis--de.pdf)
Supplement: Supplementary file 1 [file 9783110376265_Inhaltsverzeichnis--de.pdf]

# Inhaltsverzeichnis

---

## Modul 1.1

### Einführung in die Volkswirtschaftslehre

|            |                                                             |           |
|------------|-------------------------------------------------------------|-----------|
| <b>1</b>   | <b>Bedeutung und Grundlagen der Ökonomie .....</b>          | <b>3</b>  |
| <b>1.1</b> | <b>Warum wirtschaftet der Mensch? .....</b>                 | <b>3</b>  |
| 1.1.1      | Vertreibung aus dem Paradies .....                          | 3         |
| 1.1.2      | Existenzfunktion und Sinnfunktion des Wirtschaftens .....   | 3         |
| <b>1.2</b> | <b>Ressourcen und Güter .....</b>                           | <b>4</b>  |
| 1.2.1      | Bedürfnisse und Bedarf des Menschen .....                   | 5         |
| 1.2.2      | Das Angebot an Gütern .....                                 | 6         |
| 1.2.3      | Der Einsatz von Produktionsfaktoren .....                   | 6         |
| <b>1.3</b> | <b>Wirtschaften und ökonomisches Prinzip .....</b>          | <b>8</b>  |
| 1.3.1      | Rationales Handeln des Menschen .....                       | 9         |
| 1.3.2      | Das ökonomische Prinzip .....                               | 9         |
| 1.3.3      | Praxisrelevanz des rationalen Verhaltens von Menschen ..... | 11        |
| <b>1.4</b> | <b>Allokation und Distribution .....</b>                    | <b>13</b> |
| 1.4.1      | Allokation und Ressourcenverteilung .....                   | 14        |
| 1.4.2      | Distribution und Güterverteilung .....                      | 14        |
| 1.4.3      | Beispielaufgabe zu Allokation und Distribution .....        | 15        |
| <b>1.5</b> | <b>Akteure der Wirtschaft .....</b>                         | <b>16</b> |
| 1.5.1      | Ordnungsprinzipien der Wirtschaft .....                     | 16        |
| 1.5.2      | Private Haushalte: .....                                    | 17        |
| 1.5.3      | Unternehmen .....                                           | 18        |
| 1.5.4      | Staat .....                                                 | 19        |
| 1.5.5      | Ausland .....                                               | 21        |
| <b>1.6</b> | <b>Märkte .....</b>                                         | <b>21</b> |
| 1.6.1      | Gütermarkt .....                                            | 22        |
| 1.6.2      | Arbeitsmarkt .....                                          | 23        |
| 1.6.3      | Geldmarkt .....                                             | 24        |
| <b>2</b>   | <b>Das Marktmodell .....</b>                                | <b>27</b> |
| <b>2.1</b> | <b>Gesetz von Angebot und Nachfrage .....</b>               | <b>27</b> |
| <b>2.2</b> | <b>Gleichgewichtsbildung auf dem Gütermarkt .....</b>       | <b>28</b> |
| 2.2.1      | Allgemeines Nachfrageverhalten .....                        | 29        |
| 2.2.2      | Allgemeines Angebotsverhalten .....                         | 30        |
| 2.2.3      | Angebot trifft Nachfrage .....                              | 32        |

|            |                                                                        |           |
|------------|------------------------------------------------------------------------|-----------|
| <b>2.3</b> | <b>Funktionsweise des Preismechanismus – Beispielfälle.....</b>        | <b>34</b> |
| 2.3.1      | Nachfragesteigerung durch Hitze (Nachfrageüberhang).....               | 34        |
| 2.3.2      | Konsum von Magic macht doof (Nachfragerlücke) .....                    | 35        |
| 2.3.3      | Überproduktion von Magic (Angebotsüberhang) .....                      | 35        |
| 2.3.4      | Lieferengpass von Magic (Angebotslücke).....                           | 36        |
| 2.3.5      | Der Wasserverkäufer und die durstigen Wanderer .....                   | 37        |
| <br>       |                                                                        |           |
| <b>3</b>   | <b>Marktversagen und öffentliche Güter .....</b>                       | <b>39</b> |
| <b>3.1</b> | <b>Marktmechanismus und Marktversagen.....</b>                         | <b>39</b> |
| <b>3.2</b> | <b>Ausschließbarkeit.....</b>                                          | <b>40</b> |
| 3.2.1      | Der Markt funktioniert – Private Güter.....                            | 40        |
| 3.2.2      | Nichtausschließbarkeit und Marktversagen .....                         | 41        |
| 3.2.3      | Rivalität im Konsum .....                                              | 42        |
| 3.2.4      | Trittbrettfahrerverhalten .....                                        | 43        |
| <b>3.3</b> | <b>Meritorische Güter und partielles Marktversagen .....</b>           | <b>44</b> |
| 3.3.1      | Beispiel Schule: Bildung als meritorisches Gut .....                   | 45        |
| 3.3.2      | Erläuterung des partiellen Marktversagens .....                        | 46        |
| 3.3.3      | Demeritorische Güter .....                                             | 47        |
| <br>       |                                                                        |           |
| <b>4</b>   | <b>Adam Smith und die Volkswirtschaftslehre.....</b>                   | <b>49</b> |
| <b>4.1</b> | <b>Entstehung der Volkswirtschaftslehre .....</b>                      | <b>49</b> |
| 4.1.1      | Das Jahr 1776.....                                                     | 49        |
| 4.1.2      | Adam Smith .....                                                       | 50        |
| 4.1.3      | Kernaussagen zum „Wohlstand der Nationen“ .....                        | 50        |
| 4.1.3.1    | Freier Markt und Eigennutz .....                                       | 51        |
| 4.1.3.2    | Bedeutung des Staates.....                                             | 52        |
| <b>4.2</b> | <b>Die Industrielle Revolution .....</b>                               | <b>53</b> |
| 4.2.1      | Definition und Merkmale der Industriellen Revolution .....             | 53        |
| 4.2.2      | Technische Erfindungen .....                                           | 54        |
| 4.2.3      | Arbeitsteilung und Tausch .....                                        | 55        |
| <b>4.3</b> | <b>Arbeitsteilung und Kostenvorteile.....</b>                          | <b>57</b> |
| 4.3.1      | Ricardo und der Methuen-Vertrag .....                                  | 57        |
| 4.3.2      | Absolute Kostenvorteile.....                                           | 58        |
| 4.3.3      | Komparative Kostenvorteile .....                                       | 59        |
| 4.3.4      | Beispielaufgabe zum Theorem der komparativen Kostenvorteile .....      | 60        |
| <b>4.4</b> | <b>Weiterentwicklung und Systematik der Volkswirtschaftslehre.....</b> | <b>62</b> |
| 4.4.1      | Entwicklung und Differenzierung der Volkswirtschaftslehre.....         | 63        |
| 4.4.2      | Disziplinen und Systematik der Volkswirtschaftslehre.....              | 66        |

|            |                                                                        |            |
|------------|------------------------------------------------------------------------|------------|
| <b>5</b>   | <b>Abnehmender Grenznutzen und mikroökonomischer Ansatz .....</b>      | <b>69</b>  |
| <b>5.1</b> | <b>Gossen und der Grenznutzen.....</b>                                 | <b>69</b>  |
| 5.1.1      | Hermann Heinrich Gossen .....                                          | 69         |
| 5.1.2      | Erstes Gossensches Gesetz.....                                         | 70         |
| 5.1.3      | Grenznutzen am Beispiel Schwarzwälder Kirschtorte.....                 | 70         |
| <b>5.2</b> | <b>Transformationskurve.....</b>                                       | <b>72</b>  |
| 5.2.1      | Definition der Transformationskurve.....                               | 73         |
| 5.2.2      | Darstellung der Transformationskurve am Beispiel Äpfel und Birnen .... | 74         |
| <b>6</b>   | <b>John Maynard Keynes und die neue Wirtschaftspolitik .....</b>       | <b>77</b>  |
| <b>6.1</b> | <b>Die Weltwirtschaftskrise .....</b>                                  | <b>77</b>  |
| 6.1.1      | Börsencrash und Schwarzer Freitag .....                                | 78         |
| 6.1.2      | Massenarbeitslosigkeit und Wohlstandsverlust .....                     | 79         |
| 6.1.3      | Parallelen zu heute? .....                                             | 80         |
| <b>6.2</b> | <b>John Maynard Keynes – Person und Werk.....</b>                      | <b>81</b>  |
| 6.2.1      | Wer war Keynes?.....                                                   | 81         |
| 6.2.2      | „Die Allgemeine“ und das Jahr 1936.....                                | 82         |
| <b>6.3</b> | <b>Das Problem Arbeitslosigkeit und die Antwort von Keynes .....</b>   | <b>83</b>  |
| 6.3.1      | Makroökonomische Modellbildung am Beispiel des Arbeitsmarktes.....     | 83         |
| 6.3.2      | Gleichgewicht bei Unterbeschäftigung .....                             | 86         |
| 6.3.3      | Klassischer und keynesianischer Lösungsansatz .....                    | 87         |
| <b>7</b>   | <b>Ludwig Erhard und das deutsche Wirtschaftswunder.....</b>           | <b>91</b>  |
| <b>7.1</b> | <b>Wirtschaftssysteme und Wirtschaftsordnungen .....</b>               | <b>91</b>  |
| 7.1.1      | Definition von Wirtschaftssystem, -ordnung und -verfassung.....        | 92         |
| 7.1.2      | Wirtschaftsordnungen in der Praxis .....                               | 93         |
| 7.1.3      | Marktwirtschaft versus Planwirtschaft.....                             | 93         |
| 7.1.4      | Abstufungen der Wirtschaftsordnungen und Konvergenztheorie .....       | 94         |
| <b>7.2</b> | <b>Die Begründer der Sozialen Marktwirtschaft .....</b>                | <b>96</b>  |
| 7.2.1      | Geistige Väter der Sozialen Marktwirtschaft.....                       | 96         |
| 7.2.2      | Der Ordoliberalismus.....                                              | 97         |
| 7.2.3      | Politische Väter der Sozialen Marktwirtschaft.....                     | 98         |
| 7.2.4      | Konzept der Sozialen Marktwirtschaft.....                              | 99         |
|            | 7.2.4.1 Freiheit und Gerechtigkeit .....                               | 99         |
|            | 7.2.4.2 Politikfelder der Sozialen Marktwirtschaft .....               | 101        |
| <b>7.3</b> | <b>Das deutsche Wirtschaftswunder .....</b>                            | <b>102</b> |
| 7.3.1      | Wachstum und Wohlstand .....                                           | 102        |
| 7.3.2      | Europäisches Wiederaufbauprogramm – Der Marshall-Plan.....             | 104        |

|            |                                                                |            |
|------------|----------------------------------------------------------------|------------|
| <b>7.4</b> | <b>Das Grundgesetz und die Soziale Marktwirtschaft.....</b>    | <b>105</b> |
| 7.4.1      | Der Blick in das Grundgesetz .....                             | 106        |
| 7.4.2      | Grundgesetzliche Verankerung der Sozialen Marktwirtschaft..... | 107        |
| <b>8</b>   | <b>Stabilitätsgesetz und magisches Viereck.....</b>            | <b>109</b> |
| <b>8.1</b> | <b>Der Sachverständigenrat.....</b>                            | <b>109</b> |
| <b>8.2</b> | <b>Stabilitätsgesetz und magisches Viereck .....</b>           | <b>111</b> |
| 8.2.1      | Das magische Viereck.....                                      | 112        |
| 8.2.1.1    | Stabilität des Preisniveaus.....                               | 113        |
| 8.2.1.2    | Hoher Beschäftigungsstand .....                                | 114        |
| 8.2.1.3    | Außenwirtschaftliches Gleichgewicht .....                      | 116        |
| 8.2.1.4    | Stetiges und angemessenes Wachstum .....                       | 117        |
| 8.2.2      | Instrumentarium des Stabilitätsgesetzes .....                  | 118        |
| 8.2.3      | Kritik am Stabilitätsgesetz .....                              | 119        |
| <b>8.3</b> | <b>Das magische Sechseck .....</b>                             | <b>120</b> |
| 8.3.1      | Verteilungsgerechtigkeit .....                                 | 120        |
| 8.3.2      | Ökologisches Gleichgewicht.....                                | 121        |

## Modul 1.2

### Mikroökonomie und Wettbewerbspolitik

|             |                                                         |            |
|-------------|---------------------------------------------------------|------------|
| <b>9</b>    | <b>Einführung in die Mikroökonomie.....</b>             | <b>127</b> |
| 9.1         | Definition von Mikroökonomie.....                       | 127        |
| 9.2         | Bedingungen der mikroökonomischen Analyse .....         | 128        |
| <b>10</b>   | <b>Bestimmungsfaktoren der Nachfrage .....</b>          | <b>131</b> |
| <b>10.1</b> | <b>Preis des nachgefragten Gutes .....</b>              | <b>132</b> |
| 10.1.1      | Preisabsatzfunktion .....                               | 132        |
| 10.1.1.1    | Prohibitivpreis und Sättigungsmenge .....               | 133        |
| 10.1.1.2    | Preis- und Mengenbildung am Beispiel Busfahrt .....     | 134        |
| 10.1.2      | Direkte Preiselastizität der Nachfrage.....             | 135        |
| 10.1.2.1    | Definition der Preiselastizität.....                    | 135        |
| 10.1.2.2    | Bestimmung der Elastizitäten am Beispiel Busfahrt.....  | 136        |
| 10.1.2.3    | Elastizitätsbereiche .....                              | 138        |
| 10.1.2.4    | Starre und elastische Nachfragefunktionen.....          | 139        |
| <b>10.2</b> | <b>Preis anderer Güter – Kreuzpreiselastizität.....</b> | <b>139</b> |
| 10.2.1      | Definition von Kreuzpreiselastizität .....              | 139        |
| 10.2.2      | Varianten der Kreuzpreiselastizität .....               | 140        |

|             |                                                                                   |            |
|-------------|-----------------------------------------------------------------------------------|------------|
| <b>10.3</b> | <b>Einkommen der Nachfrager – Einkommenselastizität .....</b>                     | <b>142</b> |
| 10.3.1      | Einkommenselastizität .....                                                       | 142        |
| 10.3.2      | Superiore Güter .....                                                             | 143        |
| 10.3.3      | Inferiore Güter .....                                                             | 144        |
| 10.3.4      | Einkommensunabhängige Güter .....                                                 | 145        |
| <b>10.4</b> | <b>Nutzenvorstellung der Nachfrager .....</b>                                     | <b>146</b> |
| 10.4.1      | Ordinaler Nutzenvergleich .....                                                   | 146        |
| 10.4.2      | Nachfragemodell im Zwei-Güter-Fall mit Budgetbeschränkung .....                   | 147        |
| <br>        |                                                                                   |            |
| <b>11</b>   | <b>Produktions- und Kostentheorie.....</b>                                        | <b>151</b> |
| <b>11.1</b> | <b>Die Angebotsseite .....</b>                                                    | <b>151</b> |
| 11.1.1      | Bestimmungsfaktoren des Angebots .....                                            | 151        |
| 11.1.2      | Innenansichten des Unternehmens .....                                             | 151        |
| 11.1.3      | Beispiel Fingerring .....                                                         | 153        |
| <b>11.2</b> | <b>Produktionsfunktionen.....</b>                                                 | <b>154</b> |
| 11.2.1      | Input-Output-Verhältnis .....                                                     | 154        |
| 11.2.2      | Produktionsfunktion vom Typ A .....                                               | 156        |
| 11.2.2.1    | Ertragsgesetz .....                                                               | 156        |
| 11.2.2.2    | Neoklassische Produktionsfunktion .....                                           | 158        |
| 11.2.2.3    | Variabilität und Faktorkonstanz .....                                             | 159        |
| <b>11.3</b> | <b>Kombination mehrerer Einsatzfaktoren.....</b>                                  | <b>159</b> |
| 11.3.1      | Substitutionalität der Einsatzfaktoren .....                                      | 160        |
| 11.3.2      | Indifferenzkurven .....                                                           | 161        |
| 11.3.3      | Minimalkostenkombination .....                                                    | 163        |
| 11.3.4      | Limitationale Produktionsfunktionen .....                                         | 165        |
| 11.3.4.1    | Linear-limitationale Produktionsfunktion .....                                    | 166        |
| 11.3.4.2    | Allgemein-limitationale Produktionsfunktion .....                                 | 167        |
| 11.3.5      | Limitationalität der Einsatzfaktoren .....                                        | 168        |
| <b>11.4</b> | <b>Von der Produktionsfunktion zur Kostenfunktion.....</b>                        | <b>170</b> |
| 11.4.1      | Herleitung einer Kostenfunktion am Beispiel Apfelkuchen .....                     | 170        |
| 11.4.2      | Beispielaufgabe Pizzaproduktion .....                                             | 172        |
| 11.4.3      | Herleitung der Kostenfunktion aus der Produktionsfunktion .....                   | 173        |
| 11.4.4      | Kostenarten, Kostenbegriffe und Kostenfunktionen .....                            | 174        |
| <br>        |                                                                                   |            |
| <b>12</b>   | <b>Entscheidungsregeln und Maximierungs-<br/>strategien der Unternehmen .....</b> | <b>177</b> |
| <b>12.1</b> | <b>Unternehmensziele .....</b>                                                    | <b>177</b> |
| <b>12.2</b> | <b>Wettbewerbssituation und Marktformen .....</b>                                 | <b>178</b> |
| 12.2.1      | Relevanter Markt und Zahl der Marktteilnehmer .....                               | 179        |
| 12.2.2      | Polypol, Oligopol und Monopol .....                                               | 180        |
| <b>12.3</b> | <b>Gewinnmaximierung im Polypol und Monopol .....</b>                             | <b>182</b> |
| <b>12.4</b> | <b>Preisbildung und Gewinnmaximierung im Polypol .....</b>                        | <b>184</b> |
| 12.4.1      | Preisbildung im Polypol – Der Marktpreis .....                                    | 184        |
| 12.4.2      | Umsatzmaximierung im Polypol .....                                                | 185        |

|             |                                                                      |            |
|-------------|----------------------------------------------------------------------|------------|
| 12.4.3      | Gewinnmaximierung im Polypol bei linearer Kostenfunktion .....       | 186        |
| 12.4.3.1    | Gewinnmaximierung am Beispiel Gartenzwerge .....                     | 186        |
| 12.4.3.2    | Gültigkeit der Entscheidungsregel im Polypol .....                   | 187        |
| 12.4.4      | Gewinnmaximierung im Polypol bei nicht-linearer Kostenfunktion ..... | 188        |
| 12.4.4.1    | Grenzumsatz gleich Grenzkosten-Regel .....                           | 188        |
| 12.4.4.2    | Marginalanalyse in der Praxis .....                                  | 191        |
| <b>12.5</b> | <b>Preisbildung und Gewinnmaximierung im Monopol.....</b>            | <b>191</b> |
| 12.5.1      | Preisbildung im Monopol.....                                         | 192        |
| 12.5.2      | Umsatzmaximierung im Monopol .....                                   | 193        |
| 12.5.3      | Gewinnmaximierung im Monopol bei linearer Kostenfunktion .....       | 194        |
| <b>12.6</b> | <b>Preisdifferenzierung im Angebotsmonopol .....</b>                 | <b>196</b> |
| 12.6.1      | Preisdifferenzierung am Beispiel Mittagessen .....                   | 197        |
| 12.6.2      | Abschöpfung der Konsumentenrente .....                               | 198        |
| 12.6.3      | Preisdifferenzierung in der Praxis .....                             | 199        |
| 12.6.4      | Produzentenrente.....                                                | 200        |
| <b>12.7</b> | <b>Preisbildung und Gewinnmaximierung im Oligopol .....</b>          | <b>201</b> |

## **13      Entscheidungsverhalten in der Spieltheorie.....203**

|             |                                          |            |
|-------------|------------------------------------------|------------|
| <b>13.1</b> | <b>Von Neumann und Morgenstern .....</b> | <b>203</b> |
| <b>13.2</b> | <b>Das Gefangenendilemma.....</b>        | <b>204</b> |
| 13.2.1      | Beispiel Bonnie und Clyde .....          | 205        |
| 13.2.2      | Beispiel Ölbohrung .....                 | 206        |
| 13.2.3      | Beispiel Werbung.....                    | 207        |

## **14      Unternehmenskonzentration.....209**

|             |                                                            |            |
|-------------|------------------------------------------------------------|------------|
| <b>14.1</b> | <b>Fusionen, Firmenübernahmen und Global Players .....</b> | <b>209</b> |
| 14.1.1      | Firmenübernahmen .....                                     | 209        |
| 14.1.2      | Die größten Unternehmen und Arbeitgeber der Welt .....     | 210        |
| 14.1.3      | Die größten Unternehmen Deutschlands .....                 | 211        |
| <b>14.2</b> | <b>Ursachen der Konzentration .....</b>                    | <b>212</b> |
| <b>14.3</b> | <b>Argumente für „Größe“ .....</b>                         | <b>213</b> |
| 14.3.1      | Economies of Scale .....                                   | 214        |
| 14.3.2      | Erfahrungskurve und Lerneffekte .....                      | 215        |
| 14.3.3      | Economies of Scope.....                                    | 216        |
| 14.3.4      | Konditionenpolitik .....                                   | 217        |
| 14.3.5      | Preispolitik .....                                         | 217        |
| 14.3.6      | Erschließen neuer Märkte .....                             | 218        |
| 14.3.7      | Marktmacht .....                                           | 218        |
| 14.3.8      | Machtmensch .....                                          | 219        |
| <b>14.4</b> | <b>Carnegie, Morgan und Rockefeller .....</b>              | <b>220</b> |
| 14.4.1      | Der Stahlkönig Andrew Carnegie .....                       | 220        |
| 14.4.2      | Der Bankier und Großunternehmer John Pierpont Morgan ..... | 221        |
| 14.4.3      | Der reichste Amerikaner John Davison Rockefeller .....     | 221        |
| 14.4.4      | Macht und Einfluss .....                                   | 222        |
| <b>14.5</b> | <b>Nachteile und Probleme der Konzentration .....</b>      | <b>222</b> |

|             |                                                           |            |
|-------------|-----------------------------------------------------------|------------|
| <b>15</b>   | <b>Wettbewerbspolitik.....</b>                            | <b>225</b> |
| <b>15.1</b> | <b>Wettbewerb und Politik – ein Paradox? .....</b>        | <b>225</b> |
| <b>15.2</b> | <b>Funktionen des Wettbewerbs.....</b>                    | <b>227</b> |
| 15.2.1      | Allokationsfunktion des Wettbewerbs .....                 | 227        |
| 15.2.2      | Innovationsfunktion des Wettbewerbs .....                 | 228        |
| 15.2.3      | Machtbeschränkungsfunktion des Wettbewerbs.....           | 228        |
| <b>15.3</b> | <b>Wettbewerbsansätze und institutionelle Ebenen.....</b> | <b>229</b> |
| 15.3.1      | Erklärungsansätze für den Wettbewerb.....                 | 229        |
| 15.3.2      | Institutionelle Ebenen der Wettbewerbspolitik .....       | 230        |
| <b>15.4</b> | <b>Wettbewerbspolitik in Deutschland .....</b>            | <b>231</b> |
| 15.4.1      | Gesetz gegen Wettbewerbsbeschränkungen .....              | 231        |
| 15.4.2      | Das Bundeskartellamt .....                                | 232        |
| 15.4.3      | Überwachung des Kartellverbots .....                      | 232        |
| 15.4.4      | Arten von Kartellen.....                                  | 233        |
| 15.4.5      | Ausnahmen vom Kartellverbot .....                         | 234        |
| 15.4.6      | Fusionskontrolle.....                                     | 235        |
|             | 15.4.6.1 Fusion .....                                     | 235        |
|             | 15.4.6.2 Ministerfusion.....                              | 237        |
| 15.4.7      | Missbrauchsaufsicht.....                                  | 237        |
| <b>15.5</b> | <b>Europäische Wettbewerbspolitik.....</b>                | <b>238</b> |
| 15.5.1      | Europäische Wettbewerbsbehörde .....                      | 238        |
| 15.5.2      | EU-Fusionskontrollverordnung .....                        | 239        |
| <b>15.6</b> | <b>Internationale Wettbewerbspolitik.....</b>             | <b>240</b> |
| 15.6.1      | Kooperation der Wettbewerbsbehörden.....                  | 240        |
| 15.6.2      | Gründung eines Weltkartellamtes .....                     | 242        |
|             | <b>Abbildungsverzeichnis .....</b>                        | <b>243</b> |
|             | <b>Literaturverzeichnis .....</b>                         | <b>245</b> |
|             | <b>Internet-Adressen .....</b>                            | <b>248</b> |
|             | <b>Stichwortverzeichnis .....</b>                         | <b>249</b> |
